# Supplementary material
Source: Springer Nature journal article supplement (https://www.springermedizin.de/resource/supplementary/12889_2007_1031_MOESM2_ESM.pdf/9503174)
Supplement: MOESM2 [file 9503174]

| 11-12th graders |         | survey given             | 89   | surveys usable |                   | 63    |               |       |                       |       |               |      |                                        |       |        |      |
|-----------------|---------|--------------------------|------|----------------|-------------------|-------|---------------|-------|-----------------------|-------|---------------|------|----------------------------------------|-------|--------|------|
| Group Type      | Num Obs | Number Groups per person |      | Size           | Time (hr) per day |       | Primary Links |       | Contact-hours per day |       | Contact-level |      | Contact-level-hours per person per day |       |        |      |
|                 |         | Avg                      | CV   | Avg            | CV                | Avg   | CV            | Avg   | CV                    | Avg   | CV            | Avg  | CV                                     | Avg   | CV     |      |
| Household       | 69      | 1.10                     | 0.27 | 3.83           | 0.31              | 4.08  | 0.47          | 2.81  | 0.42                  | 11.88 | 0.68          | 2.54 | 0.19                                   | 32.75 | 0.70   |      |
| Extended Family | 50      | 0.79                     | 1.02 | 3.26           | 0.35              | 0.79  | 1.24          | 2.26  | 0.50                  | 1.71  | 1.23          | 2.53 | 0.21                                   | 3.50  | 1.62   |      |
| Before School   | 11      | 0.17                     | 2.19 | 62.09          | 0.35              | 1.00  | 0.00          | 6.09  | 0.49                  | 6.09  | 0.35          | 2.15 | 0.12                                   | 1.67  | 2.27   |      |
| School Class    | 350     | 5.54                     | 0.14 | 25.17          | 0.36              | 0.83  | 0.00          | 4.13  | 0.90                  | 3.44  | 0.65          | 2.02 | 0.30                                   | 28.98 | 1.02   |      |
| Lunch           | 55      | 0.87                     | 0.38 | 6.45           | 0.63              | 0.75  | 0.00          | 5.45  | 0.74                  | 4.09  | 0.53          | 2.37 | 0.21                                   | 6.10  | 0.94   |      |
| Clubs           | 51      | 0.81                     | 1.01 | 35.57          | 1.30              | 0.71  | 1.04          | 5.94  | 1.14                  | 5.87  | 1.99          | 2.25 | 0.21                                   | 12.14 | 2.49   |      |
| Sports          | 53      | 0.49                     | 1.02 | 27.27          | 0.90              | 1.56  | 0.64          | 10.11 | 0.93                  | 18.57 | 1.27          | 2.39 | 0.23                                   | 23.77 | 1.74   |      |
| Work            | 28      | 0.44                     | 1.39 | 11.71          | 0.85              | 2.17  | 0.80          | 4.68  | 0.68                  | 11.32 | 1.20          | 2.13 | 0.20                                   | 10.45 | 1.81   |      |
| Church Service  | 13      | 0.21                     | 1.98 | 99.46          | 0.63              | 0.37  | 0.56          | 6.38  | 0.84                  | 2.55  | 1.08          | 2.49 | 0.20                                   | 1.24  | 2.20   |      |
| Friend Group    | 96      | 1.52                     | 0.73 | 7.74           | 1.43              | 1.43  | 0.89          | 5.47  | 1.56                  | 6.23  | 1.13          | 2.65 | 0.24                                   | 24.59 | 1.37   |      |
| Neighborhood    | 9       | 0.14                     | 2.47 | 4.22           | 0.65              | 0.41  | 0.66          | 2.44  | 0.68                  | 0.90  | 0.92          | 2.56 | 0.21                                   | 0.33  | 2.70   |      |
|                 |         |                          |      |                |                   | Total |               | 55.43 | 0.31                  |       |               |      |                                        | Total | 145.52 | 0.51 |
| 9-10th graders  |         | given                    | 69   | usable         |                   | 24    |               |       |                       |       |               |      |                                        |       |        |      |
| Group Type      | Num Obs | Number Groups per person |      | Size           | Time (hr) per day |       | Primary Links |       | Contact-hours per day |       | Contact-level |      | Contact-level-hours per person per day |       |        |      |
|                 |         | Avg                      | CV   | Avg            | CV                | Avg   | CV            | Avg   | CV                    | Avg   | CV            | Avg  | CV                                     | Avg   | CV     |      |
| Household       | 24      | 1.00                     | 0.00 | 4.46           | 0.32              | 5.33  | 0.43          | 3.46  | 0.41                  | 17.17 | 0.39          | 2.53 | 0.25                                   | 45.57 | 0.55   |      |
| Extended Family | 16      | 0.67                     | 0.96 | 3.00           | 0.37              | 0.64  | 0.78          | 2.00  | 0.55                  | 1.29  | 0.87          | 2.55 | 0.26                                   | 2.41  | 1.43   |      |
| Before School   | 3       | 0.13                     | 2.70 | 70.00          | 0.14              | 1.00  | 0.00          | 3.33  | 0.96                  | 3.33  | 0.69          | 1.95 | 0.04                                   | 0.57  | 2.86   |      |
| School Class    | 141     | 6.00                     | 0.00 | 24.61          | 0.33              | 0.83  | 0.00          | 4.03  | 0.87                  | 3.36  | 0.62          | 2.09 | 0.27                                   | 30.46 | 0.76   |      |
| Lunch           | 23      | 0.96                     | 0.21 | 8.65           | 0.73              | 0.75  | 0.00          | 4.87  | 0.42                  | 3.65  | 0.30          | 2.47 | 0.22                                   | 6.25  | 0.52   |      |
| Clubs           | 18      | 0.75                     | 1.43 | 20.83          | 0.84              | 0.40  | 1.37          | 3.89  | 1.17                  | 3.44  | 2.78          | 2.51 | 0.18                                   | 6.26  | 3.08   |      |
| Sports          | 16      | 0.46                     | 1.11 | 23.63          | 0.50              | 1.63  | 0.40          | 6.69  | 0.95                  | 12.52 | 1.12          | 2.49 | 0.18                                   | 15.02 | 1.64   |      |
| Work            | 5       | 0.21                     | 1.99 | 10.00          | 0.51              | 2.76  | 0.48          | 7.00  | 0.36                  | 19.24 | 0.58          | 2.15 | 0.10                                   | 8.74  | 2.09   |      |
| Church Service  | 5       | 0.21                     | 1.99 | 218.00         | 0.83              | 0.26  | 0.46          | 2.80  | 0.47                  | 0.77  | 0.82          | 2.95 | 0.21                                   | 0.45  | 2.13   |      |
| Friend Group    | 32      | 1.33                     | 0.90 | 7.34           | 1.02              | 1.20  | 0.75          | 5.63  | 1.30                  | 8.80  | 2.39          | 2.78 | 0.31                                   | 33.35 | 2.70   |      |
| Neighborhood    | 1       | 0.04                     | 4.90 | 5.00           | 0.00              | 1.00  | 0.00          | 1.00  | 0.00                  | 1.00  | 0.00          | 2.00 | 0.00                                   | 0.08  | 2.70   |      |
|                 |         |                          |      |                |                   | Total |               | 49.65 | 0.25                  |       |               |      |                                        | Total | 149.16 | 0.69 |
| 7th graders     |         | given                    | 47   | usable         |                   | 26    |               |       |                       |       |               |      |                                        |       |        |      |
| Group Type      | Num Obs | Number Groups per person |      | Size           | Time (hr) per day |       | Primary Links |       | Contact-hours per day |       | Contact-level |      | Contact-level-hours per person per day |       |        |      |
|                 |         | Avg                      | CV   | Avg            | CV                | Avg   | CV            | Avg   | CV                    | Avg   | CV            | Avg  | CV                                     | Avg   | CV     |      |
| Household       | 30      | 1.15                     | 0.32 | 3.70           | 0.29              | 5.93  | 0.34          | 2.70  | 0.40                  | 16.03 | 0.52          | 3.25 | 0.16                                   | 59.63 | 0.58   |      |
| Extended Family | 24      | 0.92                     | 0.92 | 3.38           | 0.44              | 0.57  | 0.74          | 2.38  | 0.63                  | 1.40  | 1.02          | 2.81 | 0.21                                   | 3.59  | 1.37   |      |
| Before School   | 0       | 0.00                     |      | 0.00           |                   | 0.00  |               | 0.00  |                       | 0.00  |               |      |                                        | 0.00  |        |      |
| School Class    | 179     | 7.00                     | 0.00 | 22.33          | 0.37              | 0.75  | 0.00          | 3.90  | 0.79                  | 2.92  | 0.57          | 2.13 | 0.18                                   | 31.86 | 0.83   |      |
| Lunch           | 26      | 1.00                     | 0.00 | 7.96           | 0.31              | 0.50  | 0.00          | 5.65  | 0.44                  | 2.83  | 0.31          | 2.19 | 0.18                                   | 4.52  | 0.52   |      |
| Clubs           | 31      | 1.19                     | 0.92 | 15.48          | 0.91              | 0.13  | 0.55          | 3.42  | 1.07                  | 0.45  | 1.23          | 2.29 | 0.18                                   | 1.38  | 1.71   |      |
| Sports          | 31      | 0.65                     | 0.74 | 18.45          | 0.55              | 0.68  | 0.48          | 7.35  | 0.80                  | 5.38  | 0.93          | 2.56 | 0.19                                   | 9.32  | 1.25   |      |
| Work            | 7       | 0.27                     | 1.68 | 3.57           | 0.36              | 0.61  | 0.86          | 2.57  | 0.49                  | 1.78  | 1.00          | 2.68 | 0.18                                   | 1.20  | 1.88   |      |
| Church Service  | 5       | 0.23                     | 1.86 | 92.60          | 0.87              | 0.18  | 0.35          | 5.60  | 0.69                  | 1.00  | 0.71          | 2.60 | 0.16                                   | 0.61  | 2.04   |      |
| Friend Group    | 34      | 1.27                     | 0.69 | 8.09           | 1.07              | 1.13  | 0.88          | 5.18  | 0.83                  | 5.01  | 1.16          | 2.65 | 0.26                                   | 16.39 | 1.33   |      |
| Neighborhood    | 5       | 0.23                     | 1.86 | 3.60           | 0.32              | 1.26  | 0.84          | 2.60  | 0.44                  | 3.67  | 0.91          | 2.73 | 0.16                                   | 2.45  | 2.08   |      |
|                 |         |                          |      |                |                   | Total |               | 56.27 | 0.18                  |       |               |      |                                        | Total | 130.96 | 0.39 |
| 5th graders     |         | given                    | 44   | usable         |                   | 28    |               |       |                       |       |               |      |                                        |       |        |      |
| Group Type      | Num Obs | Number Groups per person |      | Size           | Time (hr) per day |       | Primary Links |       | Contact-hours per day |       | Contact-level |      | Contact-level-hours per person per day |       |        |      |
|                 |         | Avg                      | CV   | Avg            | CV                | Avg   | CV            | Avg   | CV                    | Avg   | CV            | Avg  | CV                                     | Avg   | CV     |      |
| Household       | 29      | 1.04                     | 0.18 | 4.62           | 0.31              | 7.72  | 0.31          | 3.62  | 0.39                  | 28.56 | 0.37          | 2.92 | 0.20                                   | 86.08 | 0.47   |      |
| Extended Family | 25      | 0.89                     | 0.98 | 3.76           | 0.55              | 1.28  | 0.97          | 2.76  | 0.75                  | 2.77  | 1.06          | 2.74 | 0.26                                   | 6.54  | 1.47   |      |
| Before School   | 18      | 0.64                     | 0.76 | 11.06          | 1.14              | 1.40  | 0.54          | 4.06  | 0.48                  | 5.92  | 0.69          | 2.72 | 0.25                                   | 7.03  | 1.15   |      |
| School Class    | 140     | 1.00                     | 0.00 | 22.29          | 0.09              | 1.00  | 0.00          | 4.43  | 0.67                  | 4.43  | 2.86          | 2.03 | 0.11                                   | 31.51 | 0.70   |      |
| Lunch           | 27      | 0.96                     | 0.20 | 120.00^        | 0.33              | 0.33  | 0.00          | 7.48  | 0.27                  | 2.47  | 0.19          | 2.13 | 0.15                                   | 3.57  | 0.32   |      |
| Clubs           | 27      | 0.96                     | 0.87 | 15.59          | 0.63              | 0.23  | 0.90          | 8.85  | 0.76                  | 2.60  | 1.51          | 2.15 | 0.24                                   | 6.03  | 1.84   |      |
| Sports          | 9       | 0.29                     | 1.61 | 23.33          | 0.62              | 0.40  | 0.53          | 16.89 | 0.92                  | 5.87  | 1.04          | 2.67 | 0.19                                   | 4.21  | 1.81   |      |
| Work            | 0       | 0.00                     |      | 0.00           |                   | 0.00  |               | 0.00  |                       | 0.00  |               |      |                                        | 0.00  |        |      |
| Church Service  | 10      | 0.36                     | 1.37 | 225.00         | 0.86              | 0.26  | 0.40          | 5.80  | 0.95                  | 1.34  | 0.64          | 2.32 | 0.40                                   | 1.21  | 1.63   |      |
| Friend Group    | 16      | 0.57                     | 1.21 | 4.69           | 0.51              | 0.57  | 0.73          | 2.69  | 0.38                  | 1.46  | 0.83          | 2.16 | 0.16                                   | 1.83  | 1.47   |      |
| Neighborhood    | 3       | 0.11                     | 2.94 | 3.00           | 0.58              | 0.24  | 1.21          | 2.00  | 0.87                  | 0.81  | 1.58          | 2.67 | 0.22                                   | 0.26  | 3.35   |      |
| Recess          | 28      | 1.00                     | 0.00 | 411.00^        | 0.75              | 0.00  |               | 5.61  | 0.69                  | 4.21  | 0.49          | 2.39 | 0.20                                   | 7.21  | 0.69   |      |
| After School    | 10      | 0.36                     | 1.37 | 34.70          | 0.57              | 2.65  | 0.39          | 4.60  | 0.47                  | 12.50 | 0.46          | 2.40 | 0.22                                   | 7.97  | 1.54   |      |
|                 |         |                          |      |                |                   | Total |               | 44.90 | 0.42                  |       |               |      |                                        | Total | 163.46 | 0.32 |
